# Supplementary material for: Severity Scoring of Behavioral Responses of Sperm Whales (Physeter macrocephalus) to Novel Continuous versus Conventional Pulsed Active Sonar
Source: MDPI journal article supplement (doi:10.3390/jmse9040444), 2021-04-19
Supplement: s1 [file s1]

Archive with 1 entries (1 files):
- jmse-1184677-supplementary.pdf
